# Supplementary material
Source: publisher figshare collection journal article supplement (https://acs.figshare.com/ndownloader/files/22821761)
Supplement: Supplementary file 1 [file 22821761]

## Supporting Information

### Anisotropic Double Network Hydrogels via Controlled Orientation of a Physical Sacrificial Network

Daniel R. King<sup>1,2,\*,\dagger</sup>, Riku Takahashi<sup>3,\dagger,\\$</sup>, Takuma Ikai<sup>3,\dagger</sup>, Kazuki Fukao<sup>3</sup>, Takayuki Kurokawa<sup>1,2</sup>, & Jian Ping Gong<sup>1,2,4\*</sup>

<sup>1</sup>Faculty of Advanced Life Science, Hokkaido University, Sapporo 001-0021, Japan.

<sup>2</sup>Global Station for Soft Matter, Global Institution for Collaborative Research and Education (GI-CoRE), Hokkaido University, Japan.

<sup>3</sup>Graduate School of Life Science, Hokkaido University, Sapporo 001-0021, Japan.

<sup>4</sup>Institute for Chemical Reaction Design and Discovery (WPI-ICReDD), Hokkaido University, Sapporo, 001-0021, Japan.

<sup>\\$</sup>Current Address: NTT Basic Research Laboratories, Bio-Medical Informatics Research Center, NTT Corporation, 3-1 Morinosato-Wakamiya, Atsugi, Kanagawa, 243-0198, Japan.

<sup>\dagger</sup>The authors contributed equally to this work

\*Corresponding author: [dking@sci.hokudai.ac.jp](mailto:dking@sci.hokudai.ac.jp); [gong@sci.hokudai.ac.jp](mailto:gong@sci.hokudai.ac.jp)

**KEYWORDS:** Hydrogels, Semi-rigid polymers, Composite materials, Double network gels, Anisotropic structures, Anisotropic mechanical properties

#### Appendix A) Calculation of $L_{\text{contour}}/L_{\text{mesh}}$

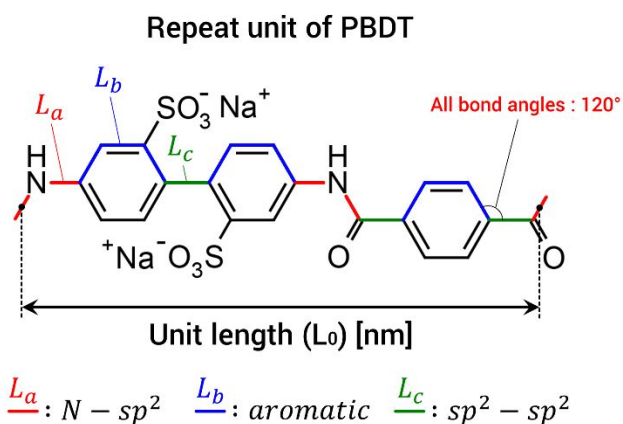

**Figure S1.** Schematic illustration of the unit length of PBDT.

To estimate contour length of PBDT ( $L_{\text{contour}}$ ), we used the following equation,

$$L_{\text{contour}} = \left( \frac{M_w}{M_u} \right) \times L_0$$

where  $M_w$ ,  $M_u$ , and  $L_0$  are the molecular weight of PBDT, repeat unit weight of PBDT and unit length of PBDT, respectively. From the GPC experiment and simple arithmetic,  $M_w$  and  $M_u$  are determined to be  $\sim 142,000$  and  $\sim 518$ . Assuming that all bond angles are  $120^\circ$  as shown in **Figure S1**, the unit length ( $L_0$ ) can be obtained as follows;

$$L_0 = \{L_a \times 2 + L_a \times \cos 60^\circ \times 2\} + \{L_b \times 3 + L_b \times \cos 60^\circ \times 6\} + \{L_c \times 3\}$$

$$L_0 = 3L_a + 6L_b + 3L_c$$

where  $L_a$ ,  $L_b$ , and  $L_c$  are the bond length of N-sp<sup>2</sup> C, aromatic C and sp<sup>2</sup>-sp<sup>2</sup> C, respectively. By taking the value from the reference<sup>[1,2]</sup>:  $L_a = 0.133$  nm,  $L_b = 0.140$  nm, and  $L_c = 0.147$  nm, the unit length ( $L_0$ ) is calculated as 1.68 nm. Finally, we obtained  $L_c$  as follows.

$$L_{\text{contour}} = \frac{142,000}{518} \times 1.68 = 460.5 \text{ nm}$$

To estimate the mesh size of the PAAm network ( $L_{\text{mesh}}$ ), we use the following equation derived from the affine model:<sup>[3]</sup>

$$L_{\text{mesh}} \approx \left( \frac{3k_b T}{E} \right)^{1/3}$$

Where  $k_b$  is Boltzmann Constant,  $T$  is temperature ( $25^\circ\text{C}$ ), and  $E$  is Young's modulus. Utilizing  $E=17$  kPa from our previous paper<sup>[4]</sup> results in  $L_{\text{mesh}} = \sim 9$  nm.

Finally,  $L_{\text{contour}}/L_{\text{mesh}} \approx 51$ , meaning that the chains of PBDT extend through many units of the PAAm network, effectively locking it in place. This result demonstrates why when stretching force is applied to the PBDT/PAAm gel the PBDT chains align and cannot relax.

## References

- [1] Fox, Marye Anne; Whitesell, James K. (1995). *Organische Chemie: Grundlagen, Mechanismen, Bioorganische Anwendungen*. Springer. ISBN 978-3-86025-249-9
- [2] F. H. Allen, O. Kennard, D. G. Watson, L. Brammer, A. G. Orpen. (1987). *Tables of bond Lengths determined by X-Ray and Neutron Diffraction. Part 1. Bond Lengths in Organic Compounds*. J. Chem. Soc. Perkin Trans. II
- [3] Rubinstein, M.; Colby, R. H. *Polymer Physics*; Oxford University Press: New York, 2003.
- [4] Takahashi, R.; Ikai, T.; Kurokawa, T.; King, D. R.; Gong, J. P. Double Network Hydrogels Based on Semi-Rigid Polyelectrolyte Physical Networks. *J. Mater. Chem. B* **2019**, 7 (41), 6347–6354.

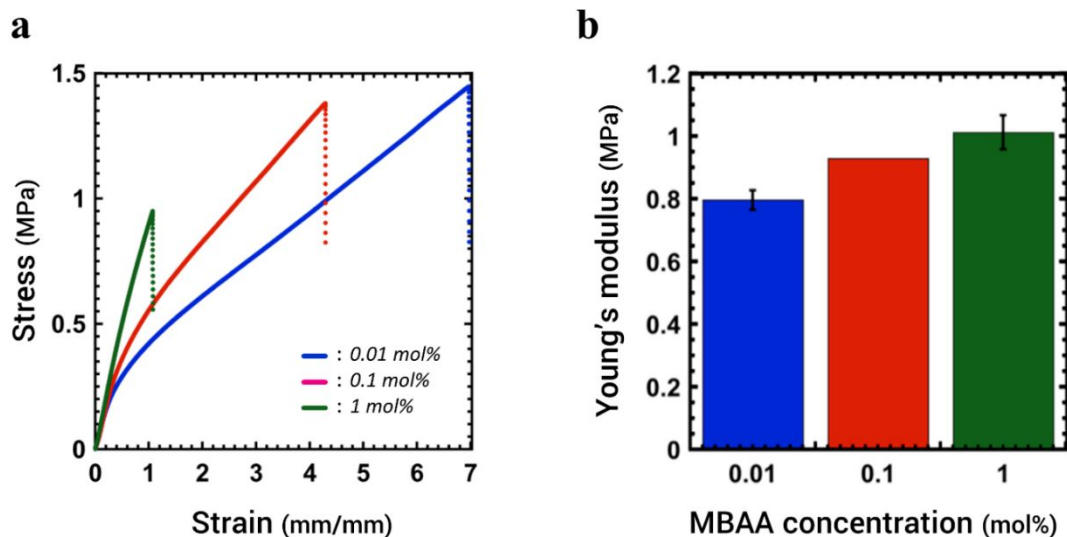

**Figure S2.** Effect of crosslinking density of the PAAm network on the mechanical properties of the PBDT/PAAm gels crosslinked in 0.15 M  $\text{ZrCl}_2\text{O}$  solution. a) Typical stress-strain curves from uniaxial tensile testing. The blue, green and red line represent the MBAA concentration for 0.01, 0.1 and 1 mol%, respectively. b) Young's modulus of the samples estimated from the initial slopes of the stress-strain curves. The error bars are standard deviation from the results of 3-5 samples. For the 0.1 mol% sample, the error was so small that error bars are not visible.

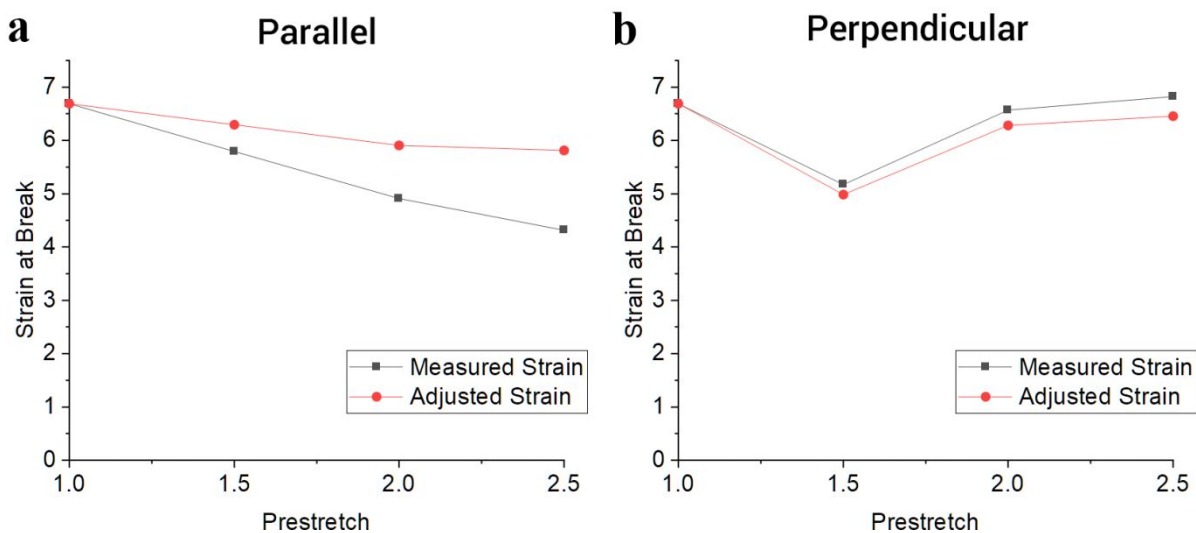

**Figure S3.** Comparison of measured strain and adjusted strain, accounting for pre-stretching. a) Strain at break in the parallel direction to pre-stretching. Pre-stretching reduces the measured strain at break. b) Strain at break in the perpendicular direction to pre-stretching. Poisson's effects cause the measured strain to be slightly greater than the true strain.
